# Supplementary material for: The ubiquitin ligase deltex-3l regulates endosomal sorting of the G protein–coupled receptor CXCR4
Source: PubMed Central journal article supplement — Mol Biol Cell. 2014 Jun 15;25(12):1892–904. doi: 10.1091/mbc.E13-10-0612 (PMC4055268; doi:10.1091/mbc.e13-10-0612), 2014-06-15
Supplement: supp_E13-10-0612v1_CombinedSupMats.pdf [file supp_E13-10-0612v1_CombinedSupMats.pdf]

# Supplemental Materials

*Molecular Biology of the Cell*

Holleman et al.

## SUPPLEMENTAL FIGURE LEGENDS

**Figure S1. DTX3L interacts directly with AIP4.** (A) Equal amounts (100 nmols) of GST and GST-AIP4 immobilized to glutathione Sepharose 4B resin were incubated with 500  $\mu$ g cleared HeLa cell lysates. Bound endogenous DTX3L was detected by immunoblotting. Blots were stained with Ponceau-S to show purified proteins. Data are representative of 3 independent experiments. (B) Purified GST and GST-DTX3L fusion proteins of either full-length (FL), N-terminally truncated (NT) or C-terminally truncated (CT) DTX3L immobilized to glutathione Sepharose 4B resin were incubated with 100  $\mu$ g cleared HeLa cell lysates transiently transfected with either empty vector (pCMV10) or FLAG-AIP4. Bound samples were resolved by 10% SDS-PAGE and analyzed by immunoblotting for DTX3L or FLAG-AIP4. Blots were stained with Ponceau-S to show purified proteins. Data are representative of 3 independent experiments and were analyzed by a one-way ANOVA.

**Figure S2. DTX3L does not regulate endosomal phosphatidylinositol 3-phosphate (PI-3P) levels in HeLa cells.** (A) HeLa cells co-transfected with YFP-2 $\times$ FYVE and siRNA directed against control or DTX3L were pre-treated with DMSO or wortmannin (100 nM) for 30 min before stimulation with CXCL12 (10 nM) for 1 h. Cells were fixed, permeabilized and stained with antibodies directed against DTX3L and EEA1. Inset represents 4 $\times$  enlargement of the boxed region. Differential interference (DIC) contrast images are shown. Equal acquisition settings (gain and intensity) were used between parallel samples within each experiment. (B) YFP-2 $\times$ FYVE puncta are not reduced in DTX3L siRNA treated cells compared with control siRNA treated cells, whereas YFP-2 $\times$ FYVE puncta were significantly reduced in wortmannin treated cells compared with DMSO. Puncta were counted using the particle analysis software of ImageJ. Data represent the average YFP-2 $\times$ FYVE puncta per cell from 3 independent experiments (35-40 cells). Data were analyzed by a Student's t-test and a one-way ANOVA ( $p < 0.0001$ ).

**Figure S3. DTX3L siRNA does not prevent agonist-promoted ubiquitination of CXCR4.** Cleared HeLa cell lysates transfected with HA-CXCR4, FLAG-ubiquitin and either control or DTX3L siRNA were subject to immunoprecipitation of HA-CXCR4 under denaturing conditions followed by immunoblotting to detect incorporated FLAG-tagged ubiquitin. Samples were separated by 7% SDS-PAGE and immunoblotted for the indicated proteins. Data are representative of 7 independent experiments.

# Figure S1. Holleman and Marchese

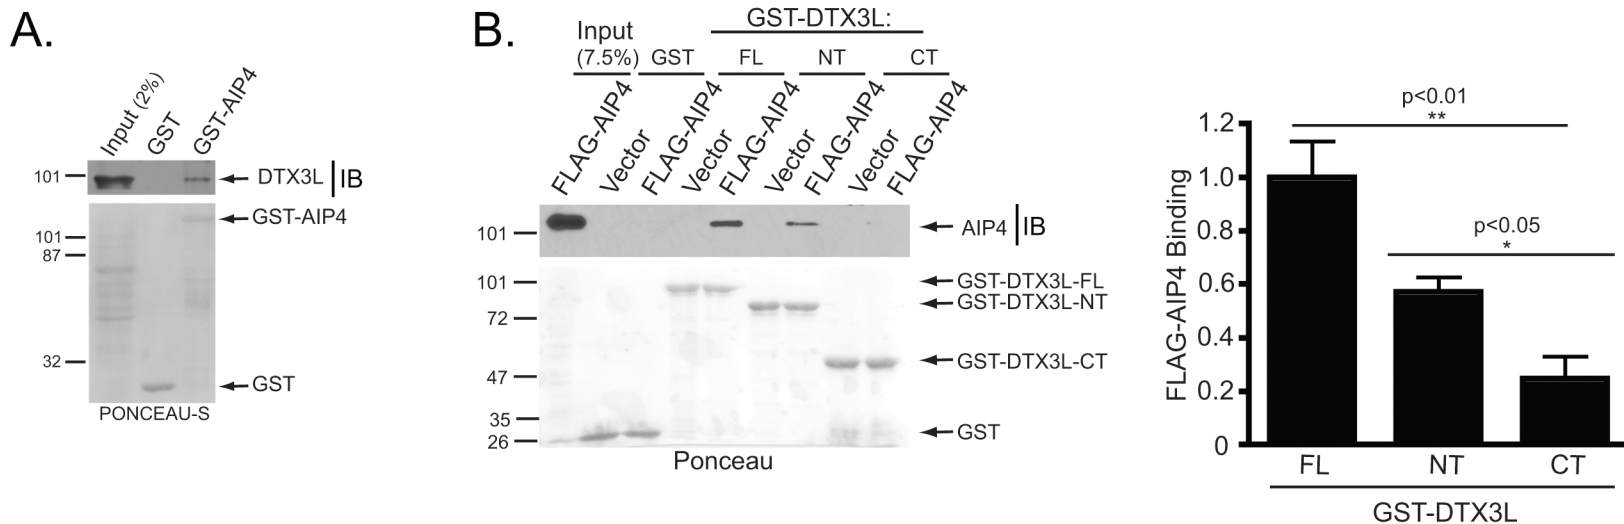

**Figure S1. DTX3L interacts directly with AIP4.** (A) Equal amounts (100 nmols) of GST and GST-AIP4 immobilized to glutathione Sepharose 4B resin were incubated with 500  $\mu$ g cleared HeLa cell lysates. Bound endogenous DTX3L was detected by immunoblotting. Blots were stained with Ponceau-S to show purified proteins. Data are representative of 3 independent experiments. (B) Purified GST and GST-DTX3L fusion proteins of either full-length (FL), N-terminally truncated (NT) or C-terminally truncated (CT) DTX3L immobilized to glutathione Sepharose 4B resin were incubated with 100  $\mu$ g cleared HeLa cell lysates transiently transfected with either empty vector (pCMV10) or FLAG-AIP4. Bound samples were resolved by 10% SDS-PAGE and analyzed by immunoblotting for DTX3L or FLAG-AIP4. Blots were stained with Ponceau-S to show purified proteins. Data are representative of 3 independent experiments and were analyzed by a one-way ANOVA.

Figure S2. Holleman and Marchese

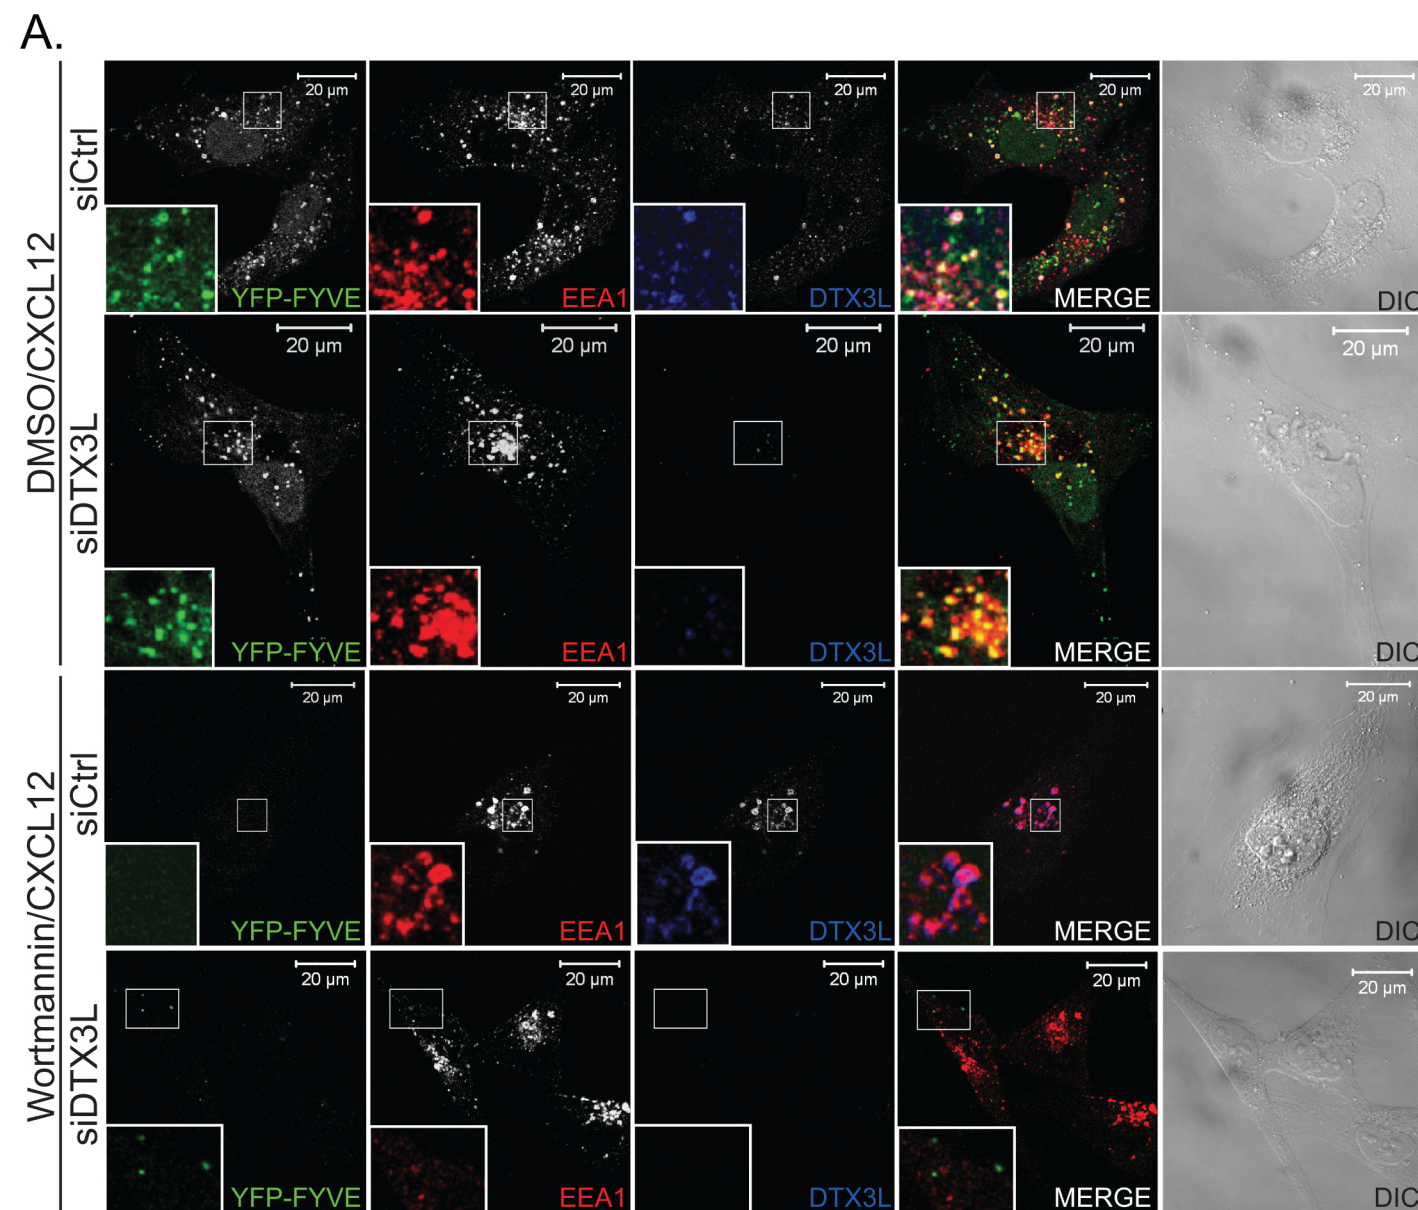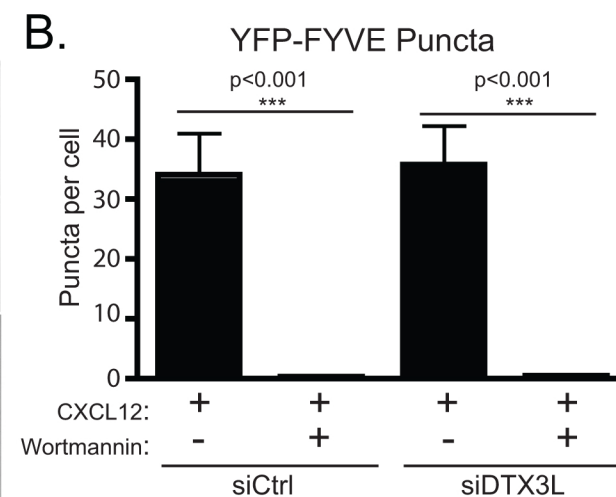

**Figure S2. DTX3L does not regulate endosomal phosphatidylinositol 3-phosphate (PI-3P) levels in HeLa cells.** (A) HeLa cells co-transfected with YFP-2×FYVE and siRNA directed against control or DTX3L were pre-treated with DMSO or wortmannin (100 nM) for 30 min before stimulation with CXCL12 (10 nM) for 1 h. Cells were fixed, permeabilized and stained with antibodies directed against DTX3L and EEA1. Inset represents 4× enlargement of the boxed region. Differential interference (DIC) contrast images are shown. Equal acquisition settings (gain and intensity) were used between parallel samples within each experiment. (B) YFP-2×FYVE puncta are not reduced in DTX3L siRNA treated cells compared with control siRNA treated cells, whereas YFP-2×FYVE puncta were significantly reduced in wortmannin treated cells compared with DMSO. Puncta were counted using the particle analysis software of ImageJ. Data represent the average YFP-2×FYVE puncta per cell from 3 independent experiments (35-40 cells). Data were analyzed by a Student's t-test and a one-way ANOVA ( $p < 0.0001$ ).

# Figure S3. Holleman and Marchese

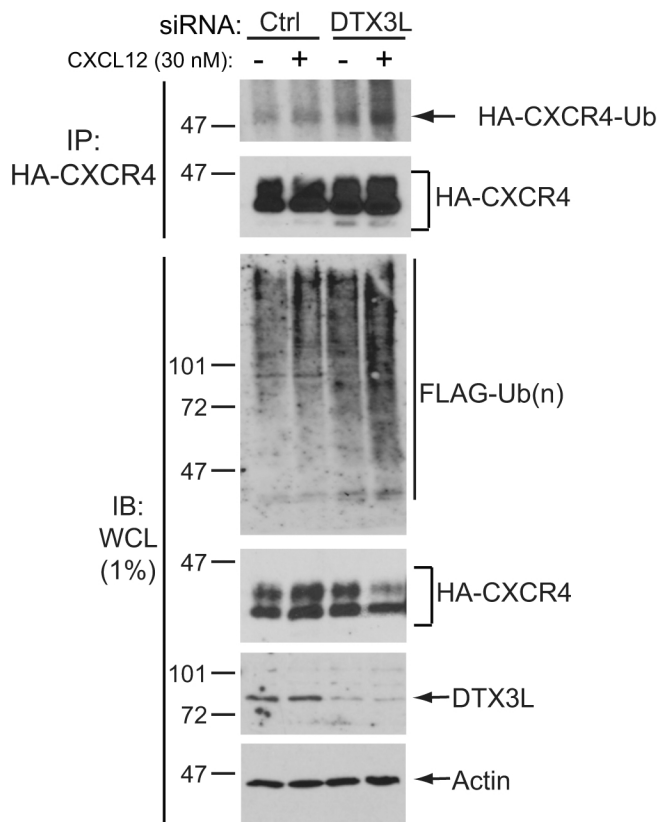

**Figure S3.** DTX3L siRNA does not prevent agonist-promoted ubiquitination of CXCR4. Cleared HeLa cell lysates transfected with HA-CXCR4, FLAG-Ub and either control or DTX3L siRNA were subject to immunoprecipitation of HA-CXCR4 under denaturing conditions followed by immunoblotting to detect incorporated FLAG-tagged ubiquitin. Samples were separated by 7% SDS-PAGE and immunoblotted for the indicated proteins. Data are representative of 7 independent experiments.
